# Supplementary material
Source: publisher site journal article supplement (https://www.dovepress.com/article/214349)
Supplement: Supplementary file 1 [file get_supplementary_file.php]

Development of nanosome-encapsulated honokiol for intravenous therapy against experimental autoimmune encephalomyelitis

Yai-Ping Hsiao1, Hui-Ting Chen1, Yu-Chih Liang2, Tse-En Wang1, Kai-Hung Huang3, Cheng-Chih Hsu3, Hong-Jen Liang4, Chung-Hsiung Huang5,*, Tong-Rong Jan, PhD1,*

1Department of Veterinary Medicine, School of Veterinary Medicine, National Taiwan University, No.1, Sec. 4, Roosevelt Road, Taipei 10617, Taiwan

2School of Medical Laboratory Science and Biotechnology, College of Medical Science and Technology, Taipei Medical University, Taipei 10617, Taiwan.

3Department of Chemistry, National Taiwan University, No.1, Sec. 4, Roosevelt Road, Taipei 10617, Taiwan.

4Department of Food Science, Yuanpei University, No.306, Yuanpei Street, Hsinchu 30015, Taiwan.

5Department of Food Science, National Taiwan Ocean University, No.2, Beining Road, Keelung 20224, Taiwan. E-mail: [huangch@mail.ntou.edu.tw](mailto:huangch@mail.ntou.edu.tw)

Correspondence:

Tong-Rong Jan, Department and Graduate Institute of Veterinary Medicine, School of Veterinary Medicine, National Taiwan University, No.1, Sec. 4, Roosevelt Road, Taipei 10617, Taiwan, ROC. Phone: +886-2-33661287; Fax: +886-2-23661475; E-mail: [tonyjan@ntu.edu.tw](mailto:tonyjan@ntu.edu.tw)

Chung-Hsiung Huang, Department of Food Science, National Taiwan Ocean University, No.2, Beining Road, Keelung 20224, Taiwan. Phone: +886-2-24622192#5115 ; E-mail: [huangch@mail.ntou.edu.tw](mailto:huangch@mail.ntou.edu.tw)


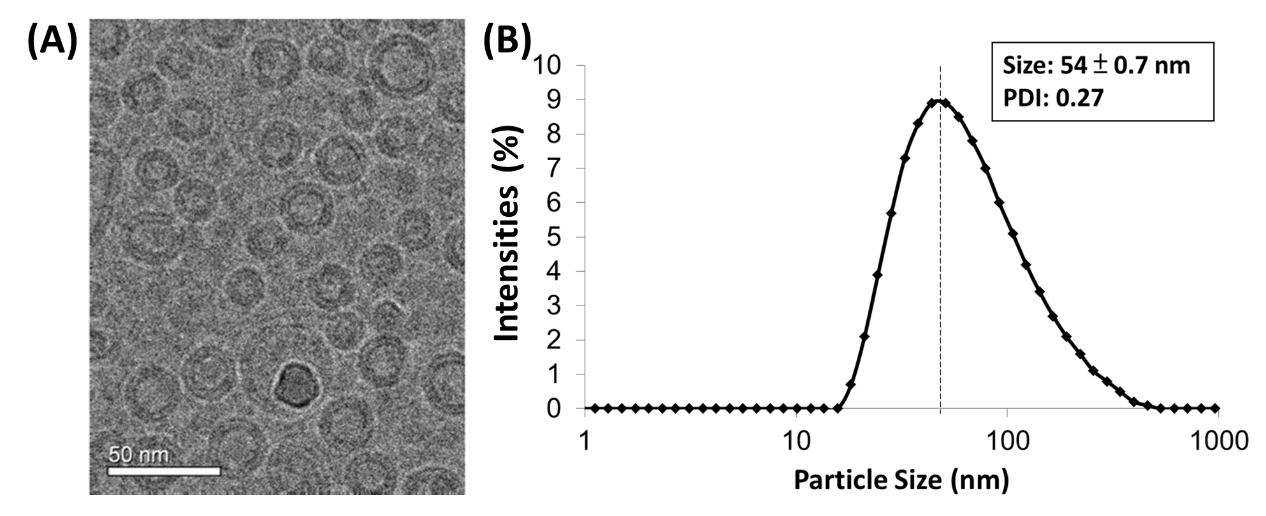


**Supplementary Figure 1.** (A) The prepared nanosomes observed by field emission gun electron microscopy revealed a sphere bilayer structure and homogeneously distributed around 50 nm, (B) which was consistent with the data of size distribution obtained from dynamic light scattering analysis.
